# Supplementary material
Source: PubMed Central journal article supplement (PMC6827835)
Supplement: noz107_suppl_supplementary_figures_1-5.pdf [file noz107_suppl_supplementary_figures_1-5.pdf]

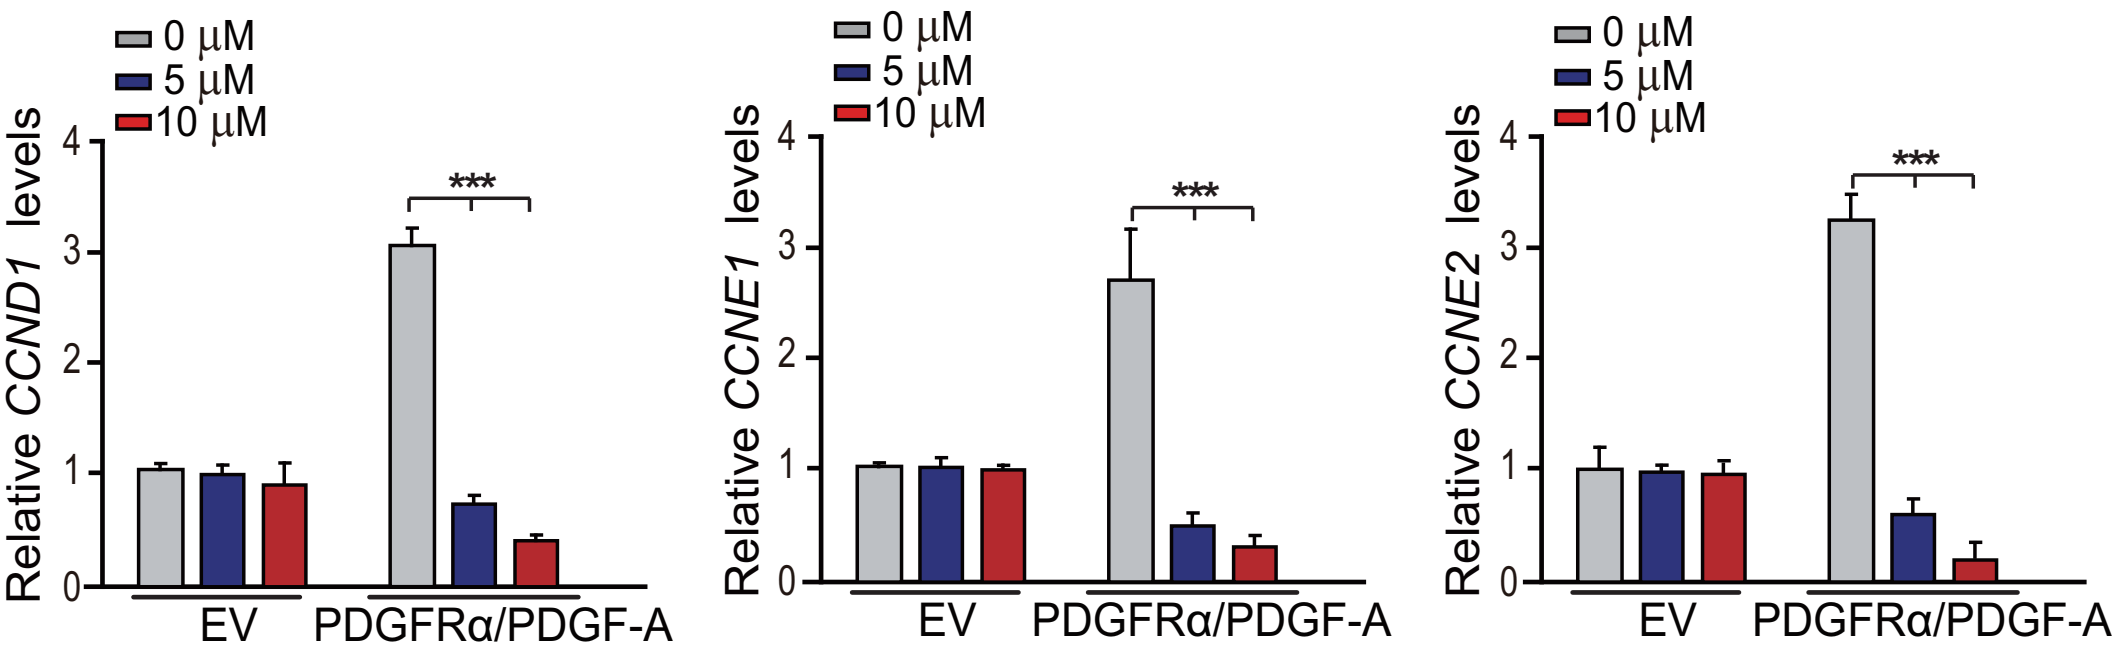

**Supplementary Figure 1** qRT-PCR analysis of effects of the indicated SHP099 treatment on levels of *CCND1*, *CCNE1*, *CCNE2* in mouse *Ink4a/Arf<sup>-/-</sup>* astrocytes with or without ectopic expression of PDGFR $\alpha$  and PDGF-A. \*\*\* $p < 0.001$ , by one-way ANOVA. Data represent three independent experiments with similar results.

A

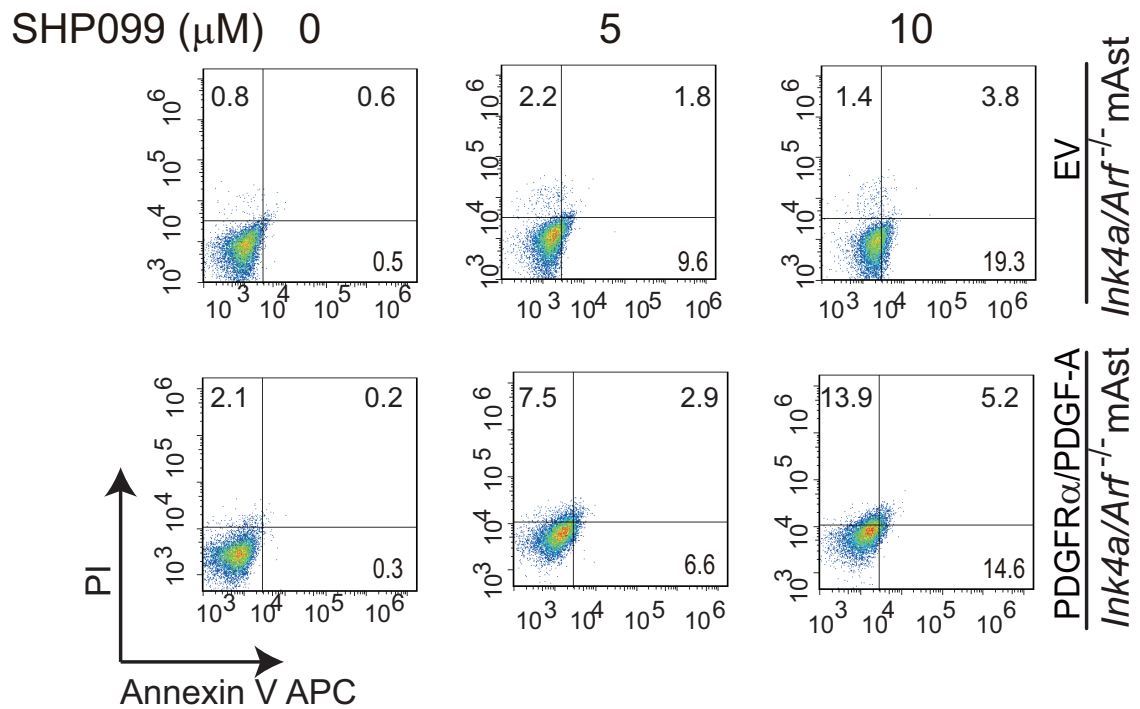

B

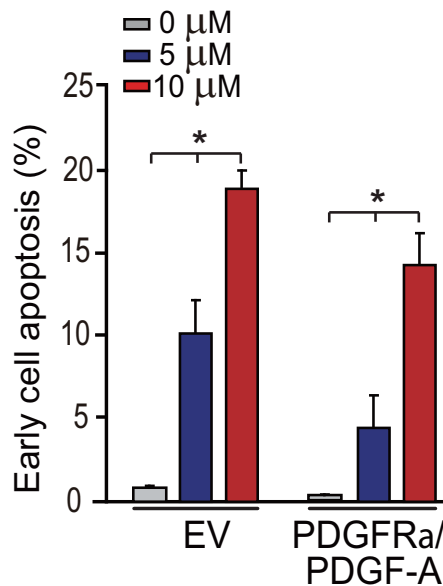

**Supplementary Figure 2 SHP099 promotes cell apoptosis in *Ink4a/Arf*<sup>-/-</sup> mAst cells with or without overexpression of PDGFR $\alpha$ /PDGF-A**

A. Representative images of flow cytometry analysis of effects of SHP099 treatment on cell apoptosis.

B. Percentage of early apoptosis cells in A.

Data are means  $\pm$  SD. \*\* $p < 0.05$ , by one-way ANOVA. Data or images represent two or three independent experiments with similar results.

A

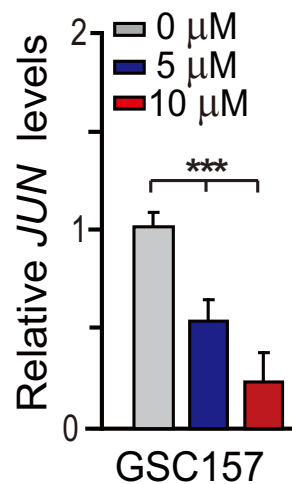

B

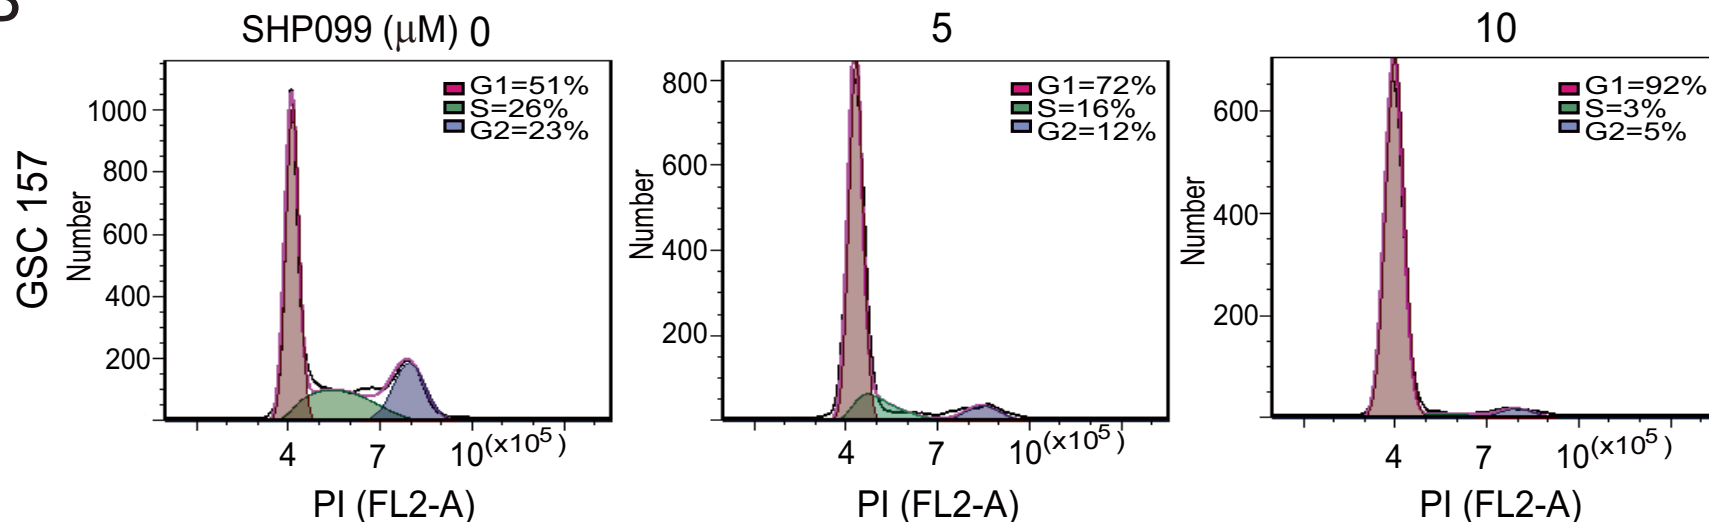

C

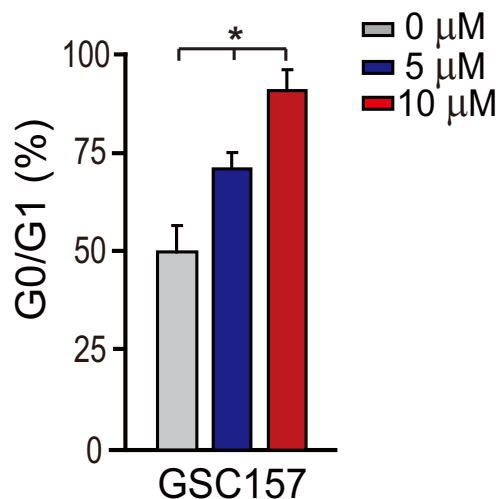

**Supplementary Figure 3 SHP099 specifically inhibits cell cycle pathways in glioma stem-like cells with PDGFR $\alpha$  activation.**

**A)** Expression of *JUN* after SHP099 treatment using qRT-PCR analysis.

**B)** Representative images from flow cytometric analysis of the influence of SHP099 treatment on cell cycle in GSC157.

Percentage of cells in G0/G1 phase in **B**. \* $p < 0.05$ , by one-way ANOVA.

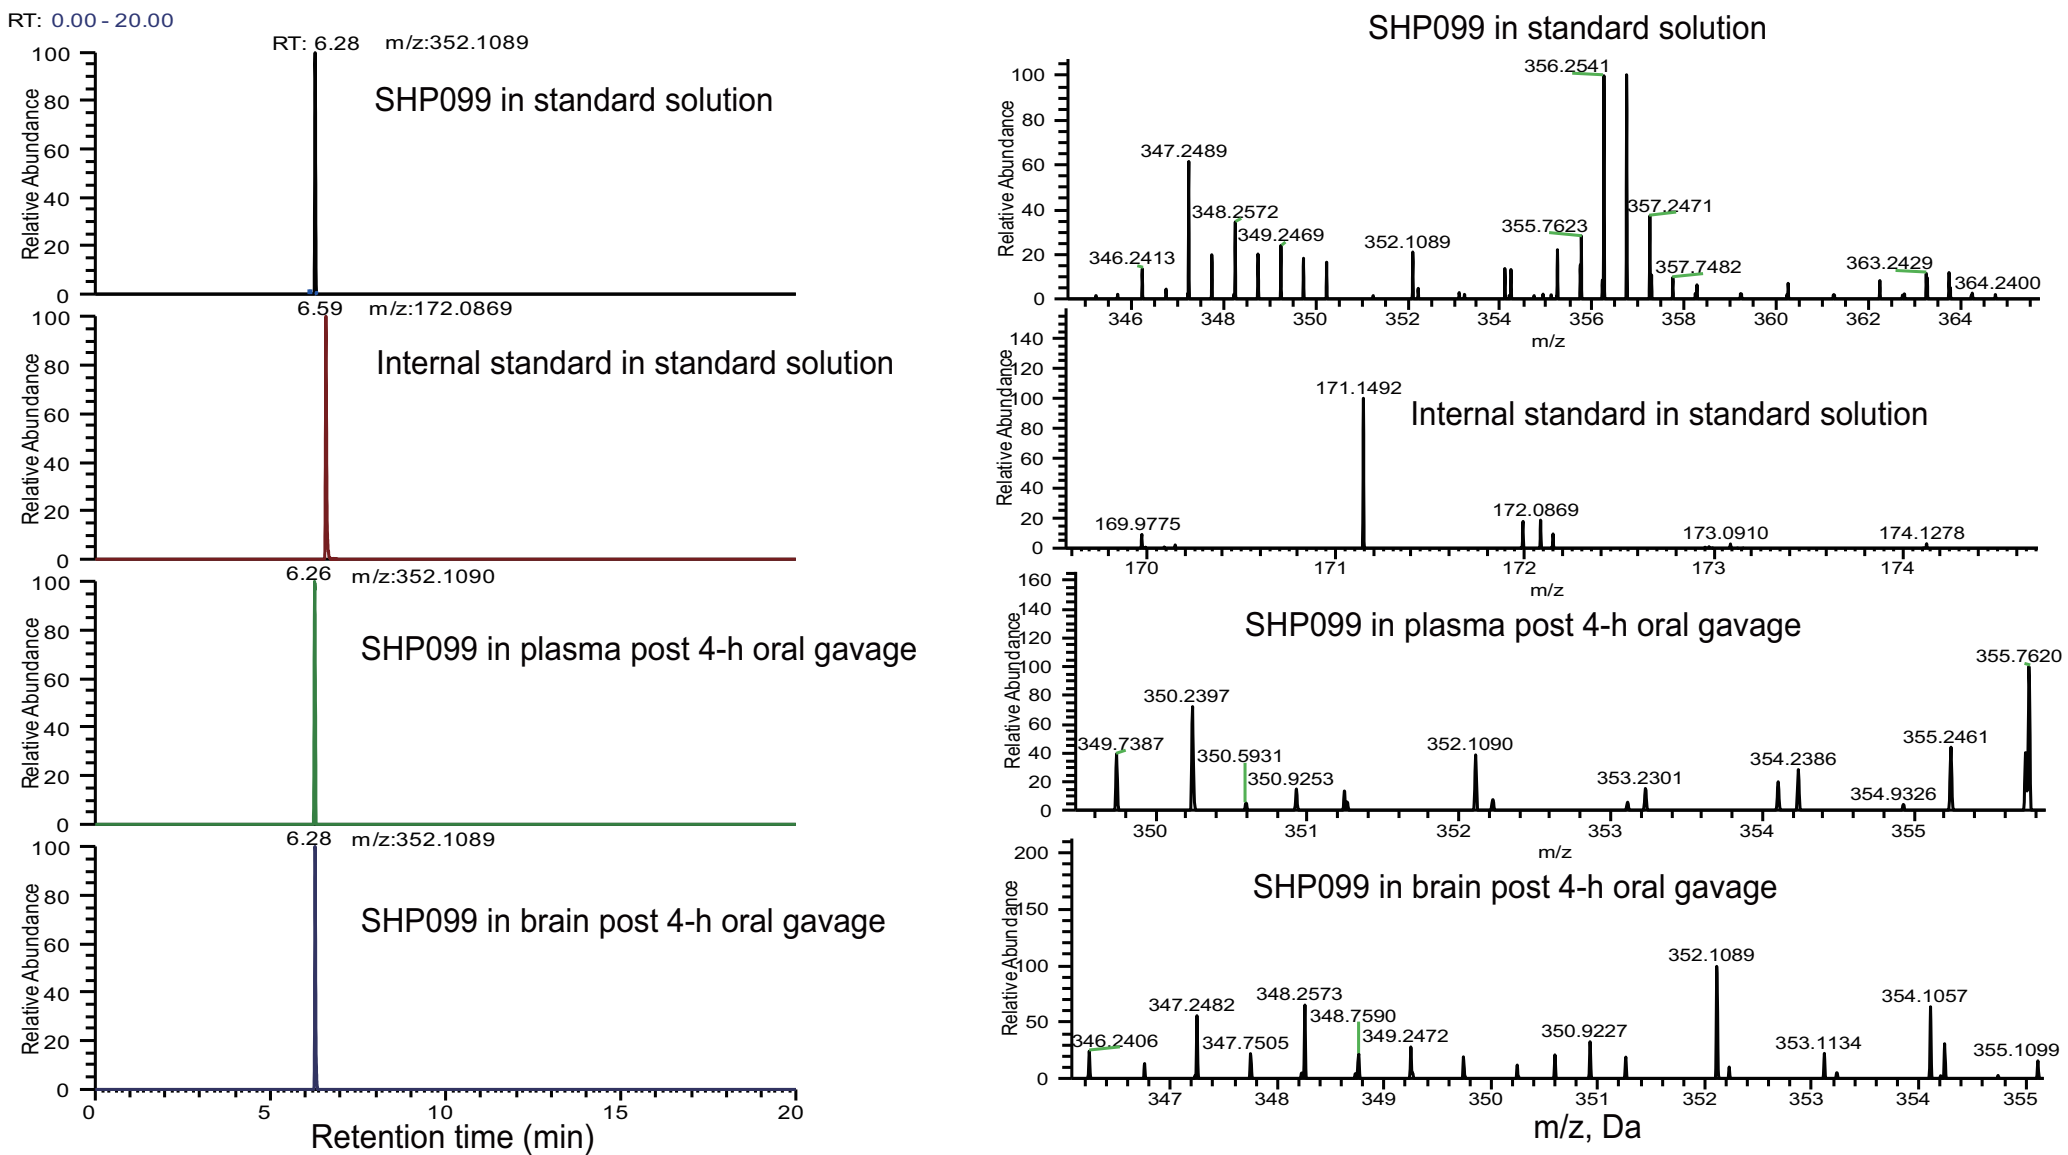

### Supplementary Figure 4 UPLC-MS analysis of SHP099 in plasma and brain post oral gavage in immunocompetent mice

Corresponding to Figure 5A, showing retention time and full-scan product ion spectrum of UPLC-MS analysis of SHP099 in standard solution, plasma, and brain post 4-h oral gavage in immunocompetent mice. 2-Amino-5-phenylpyrazine (Sigma 13535-13-2) was used as an internal standard of SHP099. Images represent two independent experiments with similar results.

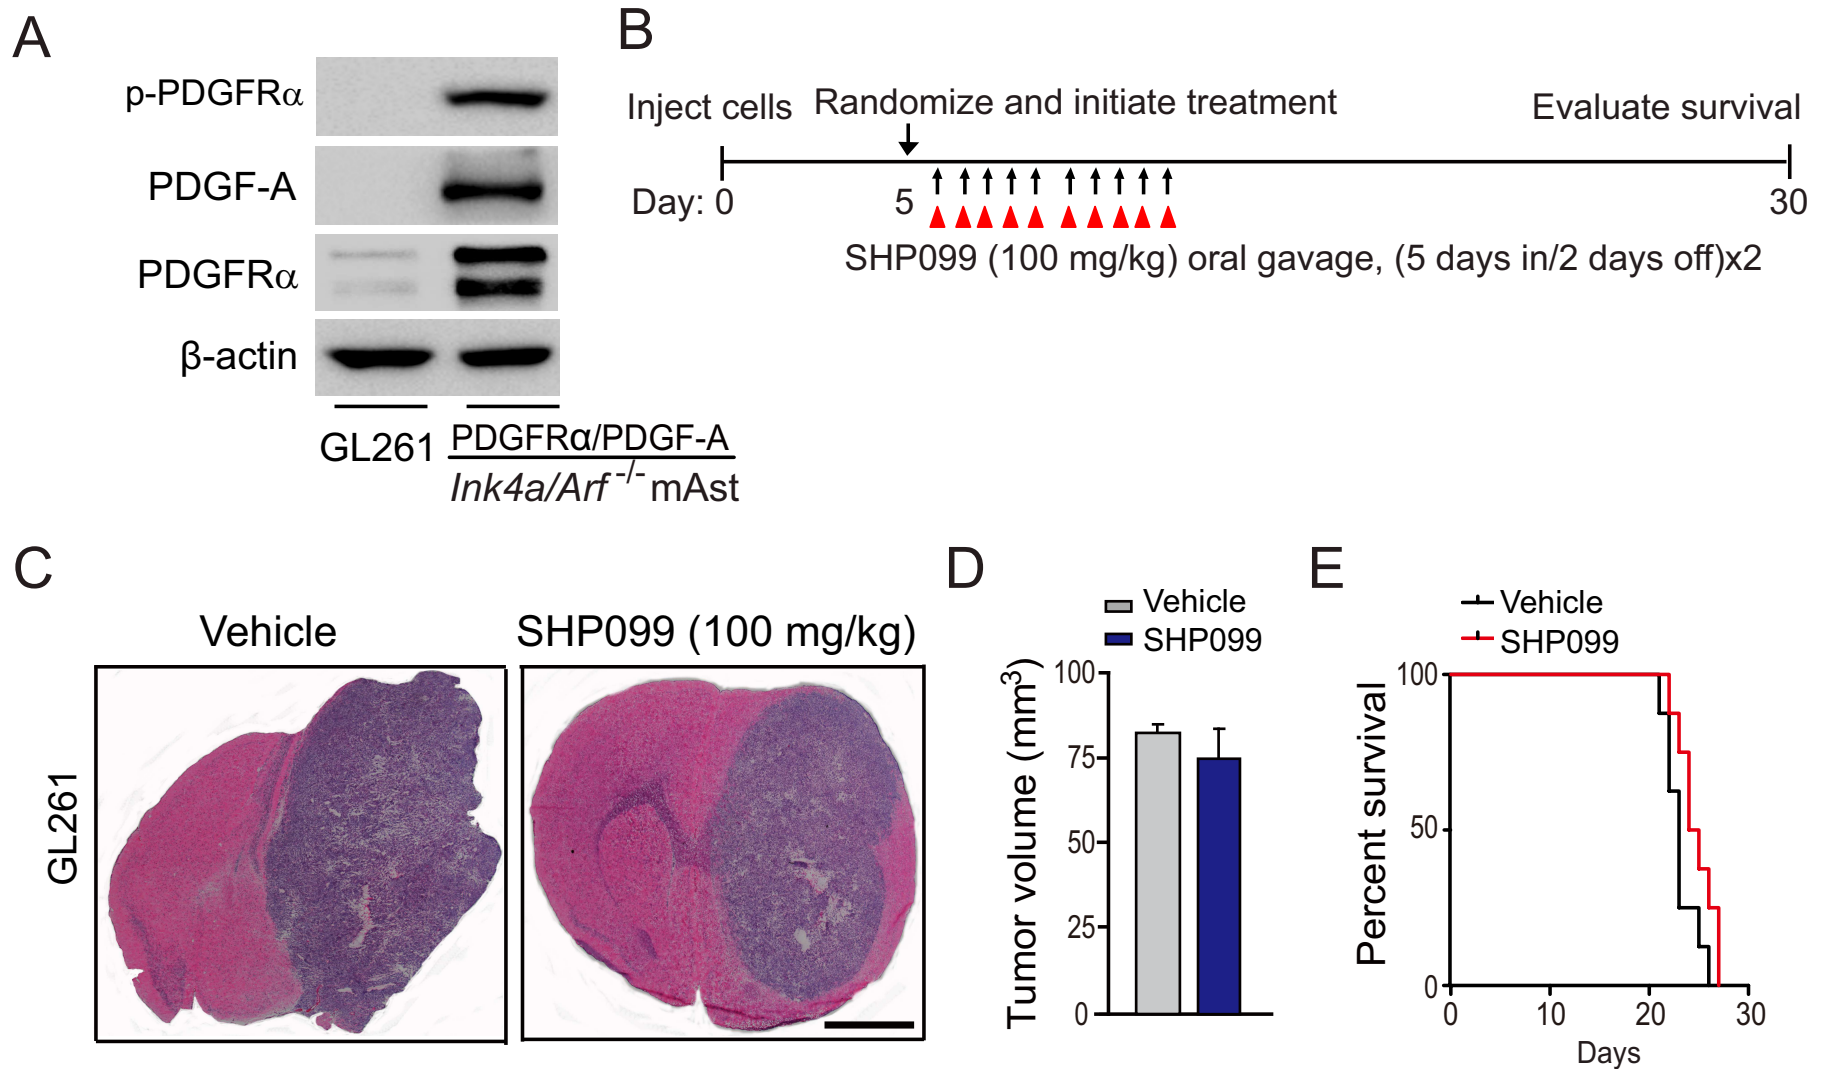

**Supplementary Figure 5 SHP099 does not impair GL261 tumor growth without PDGFR $\alpha$  activation.**

**A)** WB analysis of expression levels of PDGF-A, PDGFR $\alpha$ , and p-PDGFR $\alpha$  in GL261 cells. *Ink4a/Arf*<sup>-/-</sup> mAsts with ectopic expression of PDGF-A and PDGFR $\alpha$  were used as a control.

**B)** Treatment schemes for the evaluation of in vivo efficacy of SHP099 in GL261 xenografts. Animals were treated with 100 mg/kg SHP099 doses from Monday to Friday within two weeks.

**C)** Representative images of Haematoxylin & Eosin staining. Scale bars, 1 mm.

**D)** Quantitation of tumor volumes in **C**.

**E)** Kaplan-Meier survival analysis of animals with GL261 tumors (n=6 per group).

*p* value was calculated by two-tailed Student's *t*-test or log-rank analysis.
